# Supplementary material
Source: Royal Society of Chemistry journal article supplement (doi:10.1039/d6mr00055j)
Supplement: d6mr00055j1.pdf [file d6mr00055j1.pdf]

ELECTRONIC SUPPLEMENTARY INFORMATION

**Resonant Acoustic Mixing-Induced Polymorphic Transformation of  
Glycine Observed by Solid-State NMR**

Simon Sinn,<sup>a</sup> Elizabeth Brown,<sup>a</sup> Téodor Iftemie,<sup>a</sup> and David L. Bryce<sup>a,\*</sup>

<sup>a</sup> Department of Chemistry and Biomolecular Sciences, University of Ottawa, Ottawa, Ontario, Canada  
K1N6N5.

\*Author to whom correspondence may be addressed: [dbryce@uottawa.ca](mailto:dbryce@uottawa.ca)

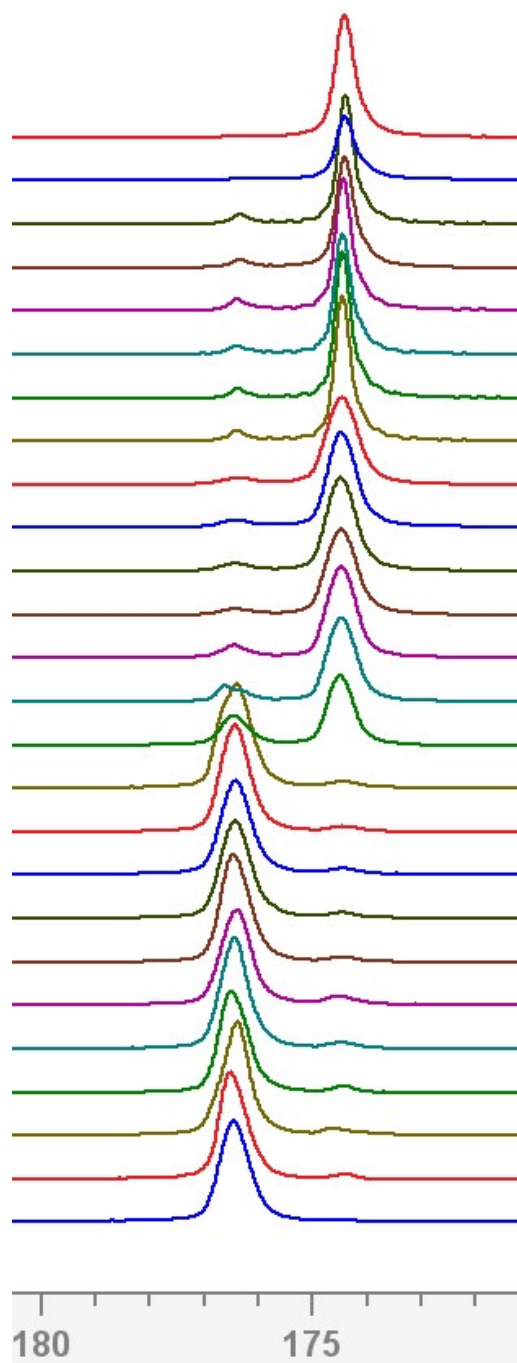

**Figure S1.** <sup>13</sup>C CP/MAS NMR spectra of glycine from Sigma-Aldrich with recrystallization and grinding at various timepoints after RAM at high level (glass vial filled with 1.54 g of glycine), recorded using a Bruker Avance III 200 NMR spectrometer with  $\nu_{\text{rot}} = 3000$  Hz. Time scale goes from zero to 750 minutes in increments of 30 minutes, from bottom to top. Scale in ppm.

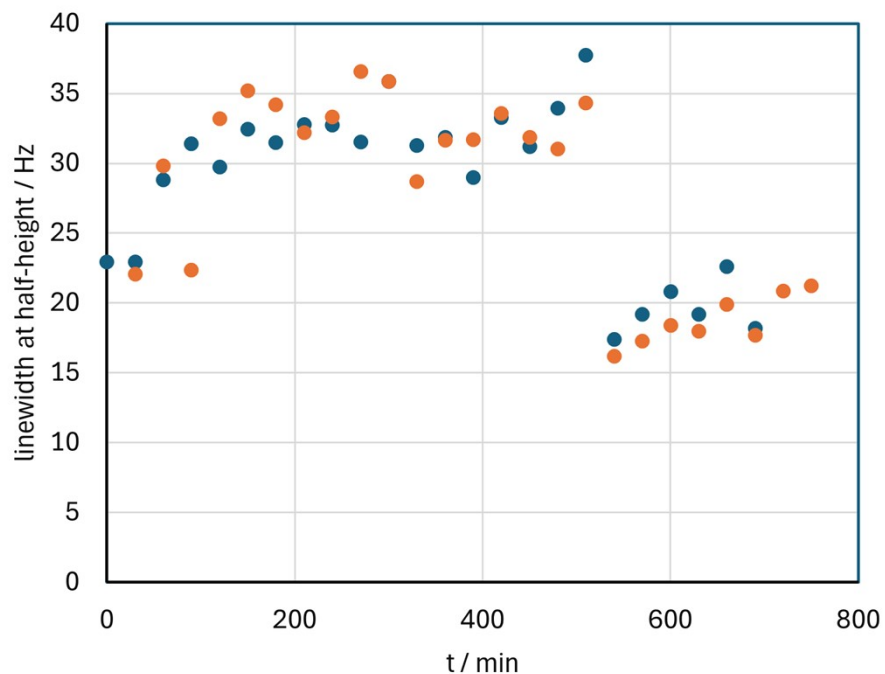

**Figure S2.** Linewidths at half-height vs time for the spectra shown in Figure S1 (glass vial filled with 1.54 g of glycine). Dark blue data points are for the  $\alpha$ -glycine carbonyl peak and orange data points are for the  $\gamma$ -glycine carbonyl peak. Spectra were acquired with a 68 ms acquisition time, TD = 2k, SI = 16k, and 1 Hz of exponential apodization. Both peaks broaden slightly from ~22 Hz at time ~0 to a maximum of ~35 Hz at ~510 min; this is followed by a resharpening of both peaks during the final phase of the transformation. We speculate that the initial broadening reflects the introduction of some crystal defects as a result of RAM, fuelling the polymorphic transformation; and that the resharpening reflects the completion of the transformation.

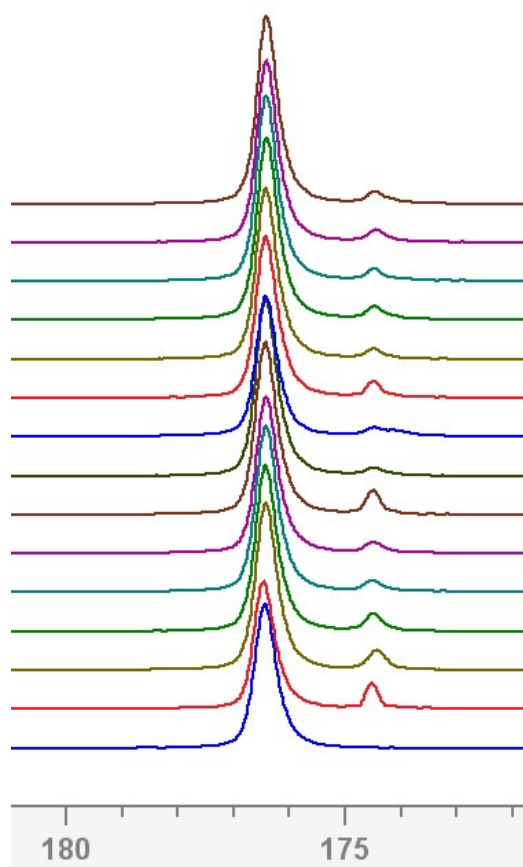

**Figure S3.**  $^{13}\text{C}$  CP/MAS NMR spectra of glycine from Sigma-Aldrich with recrystallization and grinding at various timepoints after RAM at high level (glass vial filled with 7.30 g of glycine), recorded using a Bruker Avance III 200 NMR spectrometer with  $\nu_{\text{rot}} = 3000$  Hz. Time scale goes from zero to 420 minutes in increments of 30 minutes, from bottom to top. Scale in ppm.

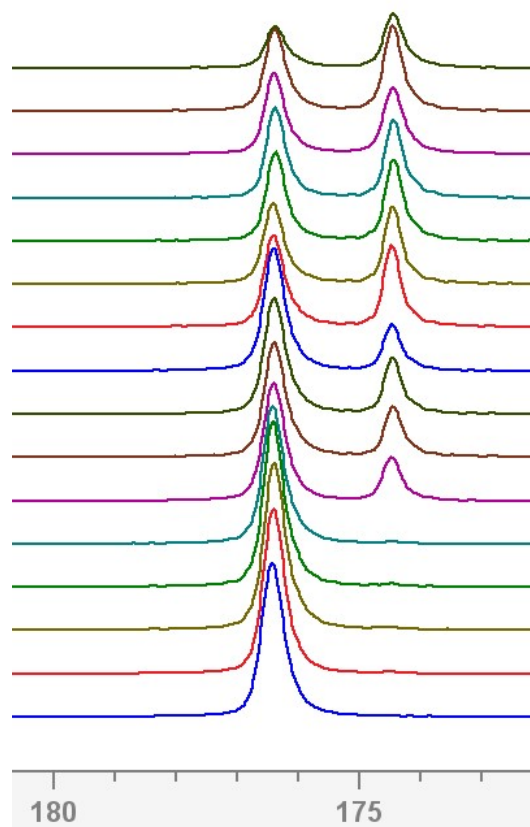

**Figure S4.** <sup>13</sup>C CP/MAS NMR spectra of glycine from Sigma-Aldrich with recrystallization and grinding at various timepoints after RAM at high level (glass vial filled with 1.70 g of glycine), recorded using a Bruker Avance III 200 NMR spectrometer with  $\nu_{\text{rot}} = 3000$  Hz. Time scale goes from zero to 900 minutes in increments of 60 minutes, from bottom to top. Scale in ppm.

**Table S1.** Peak areas of the carbonyl peak of  $\alpha$ -glycine and  $\gamma$ -glycine as reported by the Bruker TopSpin application for the solid-state  $^{13}\text{C}$  CP/MAS NMR spectra produced during the time-course experiment shown in Figure S1 (1.54 g glycine).

| Timepoint (min) | Peak area of $\alpha$ -glycine carbonyl peak (176.4 ppm) | Peak area of $\gamma$ -glycine carbonyl peak (174.4 ppm) |
|-----------------|----------------------------------------------------------|----------------------------------------------------------|
| 0               | 3007287.84                                               | 0                                                        |
| 30              | 3200335.27                                               | 160510.59                                                |
| 60              | 3403955.38                                               | 202046.41                                                |
| 90              | 3039722.99                                               | 215329.7                                                 |
| 120             | 3337786.08                                               | 197123.79                                                |
| 150             | 2843835.7                                                | 252656.19                                                |
| 180             | 3240739.02                                               | 166743.8                                                 |
| 210             | 2920043.69                                               | 178942.59                                                |
| 240             | 2804553.39                                               | 184378.18                                                |
| 270             | 3212690.41                                               | 172480.62                                                |
| 300             | 3111309.4                                                | 193872.75                                                |
| 330             | 901551.43                                                | 2106707.28                                               |
| 360             | 482549.16                                                | 2508126.12                                               |
| 390             | 379763.17                                                | 2728378.57                                               |
| 420             | 188236.66                                                | 2568434.45                                               |
| 450             | 232595.91                                                | 2807087.09                                               |
| 480             | 218295.45                                                | 2840763.48                                               |
| 510             | 200231.93                                                | 2626158.78                                               |
| 540             | 314341.48                                                | 4328370.03                                               |
| 570             | 307265.55                                                | 4399103.75                                               |
| 600             | 264765.53                                                | 3622110.45                                               |
| 630             | 342336.46                                                | 3948004.21                                               |
| 660             | 245760.67                                                | 3316589.64                                               |
| 690             | 295580.09                                                | 3871246.36                                               |
| 720             | 45148.28                                                 | 1905139.18                                               |
| 750             | 0                                                        | 3673116.57                                               |

**Table S2.** Peak areas of the carbonyl peak of  $\alpha$ -glycine and  $\gamma$ -glycine as reported by the Bruker TopSpin application for the solid-state  $^{13}\text{C}$  CP/MAS NMR spectra produced during the time-course experiment shown in Figure S3 (7.30 g glycine).

| Timepoint (min) | Peak area of $\alpha$ -glycine carbonyl peak (176.4 ppm) | Peak area of $\gamma$ -glycine carbonyl peak (174.4 ppm) |
|-----------------|----------------------------------------------------------|----------------------------------------------------------|
| 0               | 3989809.7                                                | 0                                                        |
| 30              | 3513111.3                                                | 712572.8                                                 |
| 60              | 4627635.38                                               | 550339.09                                                |
| 90              | 4599964.58                                               | 505418.56                                                |
| 120             | 4587259.84                                               | 319196.17                                                |
| 150             | 4334762.06                                               | 309635.52                                                |
| 180             | 4764984.06                                               | 678707.44                                                |
| 210             | 4914010.05                                               | 240950.67                                                |
| 240             | 3884090.62                                               | 257094.79                                                |
| 270             | 4458730.2                                                | 465084.38                                                |
| 300             | 4738438.81                                               | 302180.66                                                |
| 330             | 5023495.64                                               | 378740.45                                                |
| 360             | 5125155.56                                               | 357104.98                                                |
| 390             | 5026344.38                                               | 361445.84                                                |
| 420             | 5196335.31                                               | 357923.14                                                |

**Table S3.** Peak areas of the carbonyl peak of  $\alpha$ -glycine and  $\gamma$ -glycine as reported by the Bruker TopSpin application for the solid-state  $^{13}\text{C}$  CP/MAS NMR spectra produced during the time-course experiment shown in Figure S4 (1.70 g glycine).

| Timepoint (min) | Peak area of $\alpha$ -glycine carbonyl peak (176.4 ppm) | Peak area of $\gamma$ -glycine carbonyl peak (174.4 ppm) |
|-----------------|----------------------------------------------------------|----------------------------------------------------------|
| 0               | 4676523.48                                               | 0                                                        |
| 60              | 5027285.61                                               | 72961.75                                                 |
| 120             | 5092796.50                                               | 87242.70                                                 |
| 180             | 5027909.84                                               | 105934.14                                                |
| 240             | 4200212.66                                               | 79181.17                                                 |
| 300             | 3595371.92                                               | 1337447.14                                               |
| 360             | 3491499.43                                               | 1531689.96                                               |
| 420             | 3540819.05                                               | 1718943.42                                               |
| 480             | 3745675.19                                               | 1413316.79                                               |
| 540             | 2794406.30                                               | 2481042.30                                               |
| 600             | 2450231.25                                               | 2349994.70                                               |
| 660             | 2719772.95                                               | 2475404.82                                               |
| 720             | 2762457.84                                               | 2377211.75                                               |
| 780             | 2473639.38                                               | 2013189.38                                               |
| 840             | 2522982.67                                               | 2599728.26                                               |
| 900             | 1273481.91                                               | 1659080.06                                               |

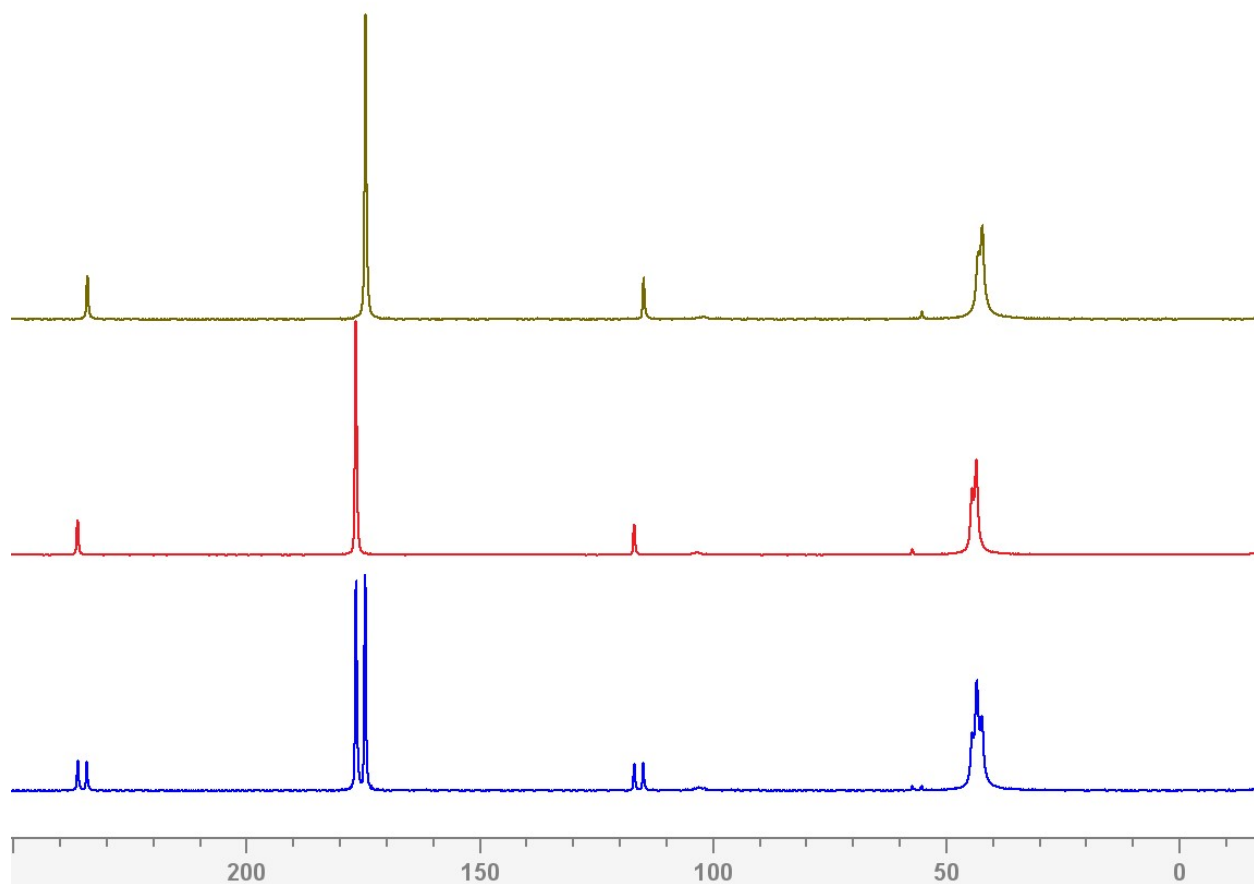

**Figure S5.** Representative <sup>13</sup>C CP/MAS NMR spectra of glycine recorded using a Bruker Avance III 200 NMR spectrometer with a rotor spinning speed of  $\nu_{\text{rot}} = 3000$  Hz. Top: 100%  $\gamma$ -glycine; middle: 100%  $\alpha$ -glycine; bottom: mixture of the two polymorphs. Scale in ppm.
